# Supplementary material for: Preventive Counseling Among Women With Histories of Gestational Diabetes Mellitus
Source: Oxford University Press journal article supplement (doi:10.2337/dc07-0435), 2007-09-28
Supplement: dc070435onlineonlyappendixtable.doc [file dc070435onlineonlyappendixtable.doc]

| Appendix Table. Items for Recall of Diabetes Prevention of Advice and Recall of Diabetes Screening Advice. |
| --- |
|  |
| Recall of Diabetes Prevention Advice (Cronbach's α = 0.70) |
| During your GDM pregnancy, did any of your providers. . . |
| Say you could develop diabetes after delivery? |
| Say diet and exercise could reduce your risk of diabetes after delivery? |
| Refer for diabetes education classes during pregnancy? |
| Say you needed to have your blood sugar tested after delivery? |
| After your GDM pregnancy, did any of your providers. . . |
| Say you could develop diabetes? |
| Say diet and exercise could reduce your risk of diabetes? |
|  |
| Recall of Diabetes Screening Advice (Cronbach's α = 0.73) |
| During your GDM pregnancy, did any of your providers. . . |
| Give you lab slips to have your blood sugar tested after delivery? |
| After your GDM pregnancy, did any of your providers. . . |
| Say you needed to have your blood sugar tested? |
| Give you lab slips to have your blood sugar tested after delivery? |
